# Supplementary material
Source: HighWire-hosted journal article supplement (https://bmjopenquality.bmj.com/highwire/filestream/136043/field_highwire_adjunct_files/0/ds5841.docx)
Supplement: ds5841.docx [file ds5841.docx]

| ***Minimum Criteria*** | **Week One Results (Jan 20 – 26th)**  **21 Patients in Total.** |
| --- | --- |
| ***Name and DOB*** | **20/21 (95%)** |
| ***Date of Admission*** | **14/21 (67%)** |
| ***Patient Location*** | **12/21 (57%)** |
| ***Responsible Consultant*** | **3/21 (14%)** |
| ***Current Diagnosis*** | **13/21 (62%)** |
| ***Results of significant/pending investigations*** | **6/21 (29%)** |
| ***Patient Condition/Baseline*** | **10/21 (48%)** |
| ***Urgency/frequency of review required*** | **10/19 (53%)** |
| ***Management Plan*** | **11/21 (52%)** |
| ***Operational Issues*** | **8/21 (38%)** |
| ***Outstanding tasks*** | **8/21 (38%)** |
